# Supplementary material
Source: publisher figshare collection journal article supplement (https://gsajournals.figshare.com/ndownloader/files/15090299)
Supplement: Supplementary file 1 [file 15090299]

**REFERENCES FOR SUPPLEMENTAL MATERIAL AND TABLES**

Bayram, O., O. S. Bayram, Y. L. Ahmed, J. Maruyama, O. Valerius *et al.*, 2012 The *Aspergillus nidulans* MAPK module AnSte11-Ste50-Ste7-Fus3 controls development and secondary metabolism. PLoS Genet 8**:** e1002816.

Dettmann, A., J. Illgen, S. Marz, T. Schurg, A. Fleissner *et al.*, 2012 The NDR kinase scaffold HYM1/MO25 is essential for MAK2 map kinase signaling in Neurospora crassa. PLoS Genet 8**:** e1002950.

Freitag, M., P. C. Hickey, N. B. Raju, E. U. Selker and N. D. Read, 2004 GFP as a tool to analyze the organization, dynamics and function of nuclei and microtubules in Neurospora crassa. Fungal Genet Biol 41**:** 897-910.

Honda, S., and E. U. Selker, 2009 Tools for fungal proteomics: multifunctional neurospora vectors for gene replacement, protein expression and protein purification. Genetics 182**:** 11-23.

O'Keeffe, G., S. Hammel, R. A. Owens, T. M. Keane, D. A. Fitzpatrick *et al.*, 2014 RNA-seq reveals the pan-transcriptomic impact of attenuating the gliotoxin self-protection mechanism in Aspergillus fumigatus. BMC Genomics 15**:** 894.

Oldenburg, K. R., K. T. Vo, S. Michaelis and C. Paddon, 1997 Recombination-mediated PCR-directed plasmid construction in vivo in yeast. Nucleic Acids Res 25**:** 451-452.

Sarikaya-Bayram, O., O. Bayram, K. Feussner, J. H. Kim, H. S. Kim *et al.*, 2014 Membrane-bound methyltransferase complex VapA-VipC-VapB guides epigenetic control of fungal development. Dev Cell 29**:** 406-420.
